# Supplementary material for: Anianabacter salinae gen. nov., sp. nov. ASV31T, a Facultative Alkaliphilic and Extremely Halotolerant Bacterium Isolated from Brine of a Millennial Continental Saltern
Source: MDPI journal article supplement (doi:10.3390/d14111009), 2022-11-21
Supplement: s1 [file s1]

# Supplementary Material

## ***Anianabacter salinae* gen. nov., sp. nov. ASV31<sup>T</sup>, a facultative alkaliphilic and extremely halotolerant bacterium isolated from brine of a millennial continental saltern**

Maia Azpiazu-Muniozguren<sup>1</sup>, Minerva García<sup>1</sup>, Lorena Laorden<sup>1,2</sup>, Irati Martinez- Malaxetxebarria<sup>1,2</sup>, Sergio Seoane<sup>3</sup>, Joseba Bikandi<sup>1</sup>, Javier Garaizar<sup>1,2</sup>, Ilargi Martínez- Ballesteros<sup>1,2\*</sup>

*1*Mikrolker Research Group, Department of Immunology, Microbiology and Parasitology, Faculty of Pharmacy, University of the Basque Country UPV/EHU, Paseo de la Universidad 7, 01006, Vitoria-Gasteiz, Álava, Spain  
*2*Bioaraba, Microbiology, Infectious Disease, Antimicrobial Agents and Gene Therapy, 01006, Vitoria-Gasteiz, Álava, Spain

*3*Plant Biology and Ecology Department, Faculty of Science and Technology, University of the Basque Country UPV/EHU, Barrio Sarriena s/n, 48940, Leioa, Bizkaia

\*Corresponding author: Ilargi Martinez-Ballesteros; e-mail: [ilargi.martinez@ehu.eus](mailto:ilargi.martinez@ehu.eus)

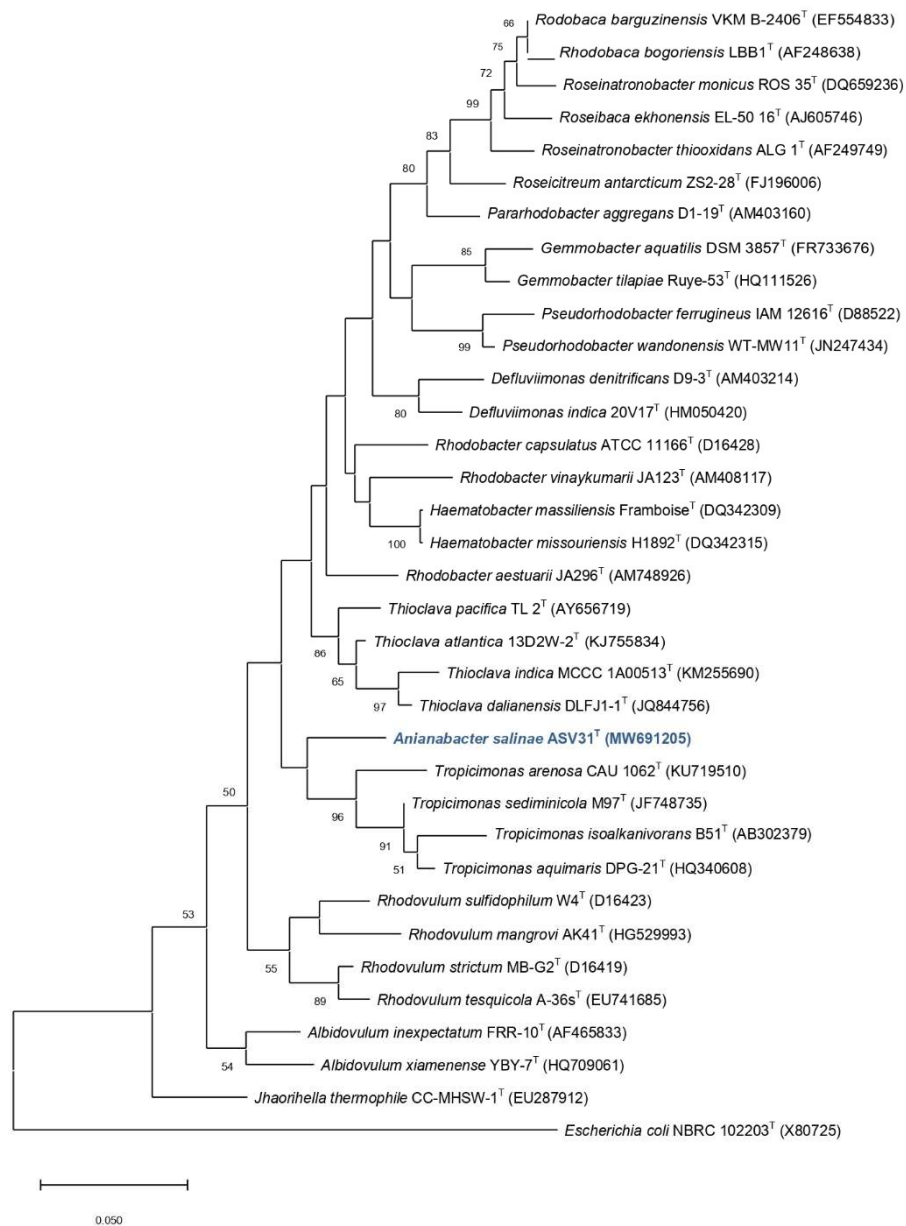

**Figure S1.** Maximum-likelihood phylogenetic tree based on 16S rRNA gene sequences showing the relationships between *Anianabacter salinae* ASV31<sup>T</sup> and other strains of *Rhodobacteraceae* family. Only bootstrap values (expressed as percentages of 1000 replications) greater than 50% are shown at branching points. *Escherichia coli* NBRC 102203<sup>T</sup> was used as the outgroup. Bar, 0.05 substitutions per nucleotide position.

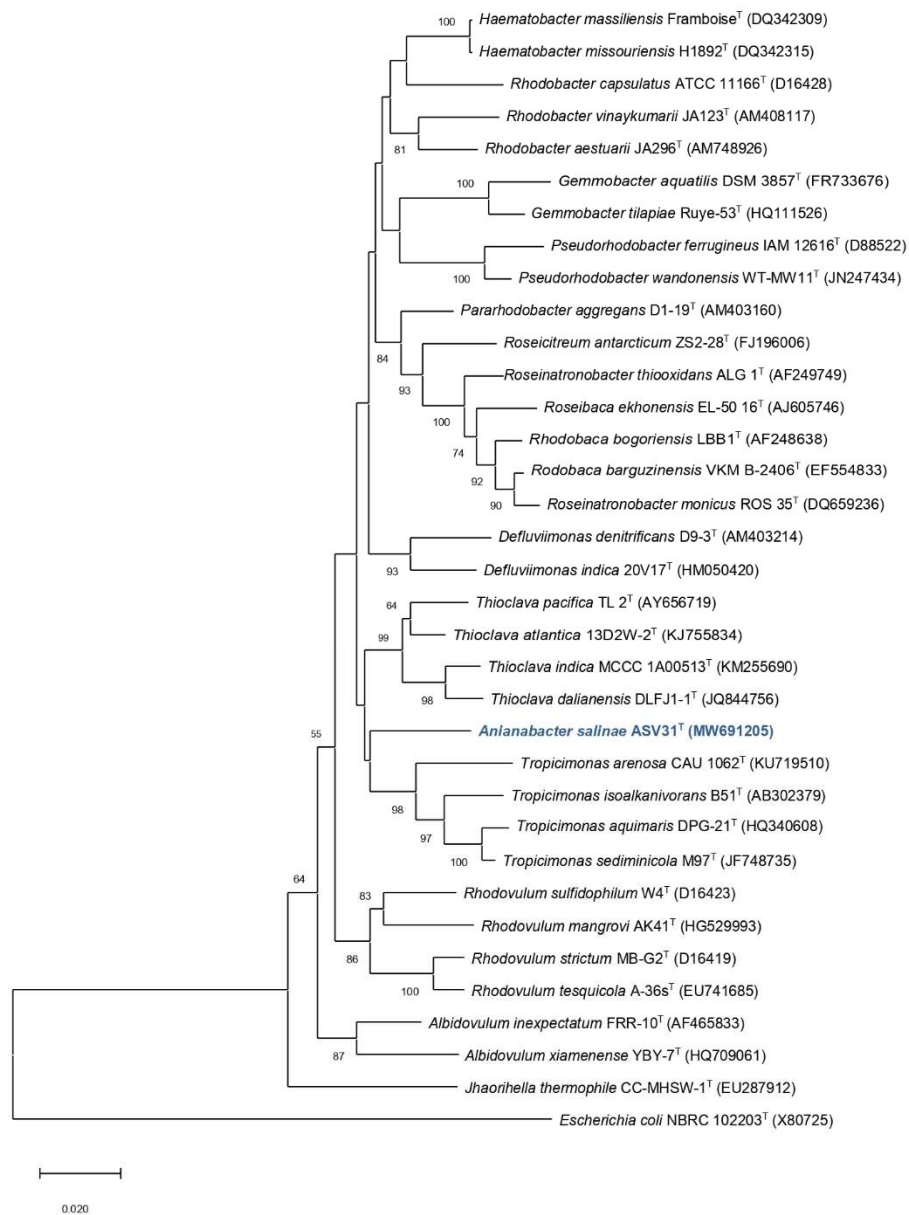

**Figure S2.** Minimum evolution phylogenetic tree based on 16S rRNA gene sequences showing the relationships between *Anianabacter salinae* ASV31<sup>T</sup> and other species of *Rhodobacteraceae* family. Only bootstrap values (expressed as percentages of 1000 replications) greater than 50% are shown at branching points. *Escherichia coli* NBRC 102203<sup>T</sup> was used as the outgroup. Bar, 0.02 substitutions per nucleotide position.

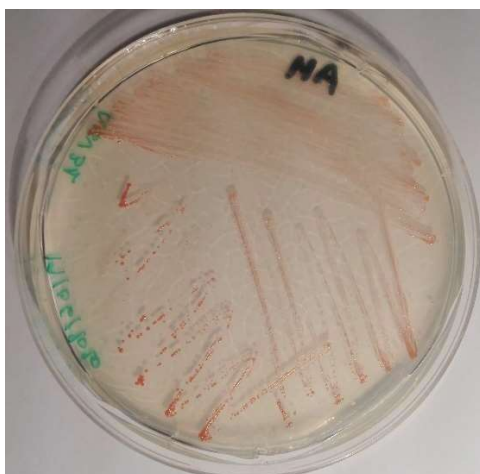

**Figure. S3.** *Anianabacter salinae* ASV31<sup>T</sup> growth on marine agar medium. Colony morphology and colour are shown.

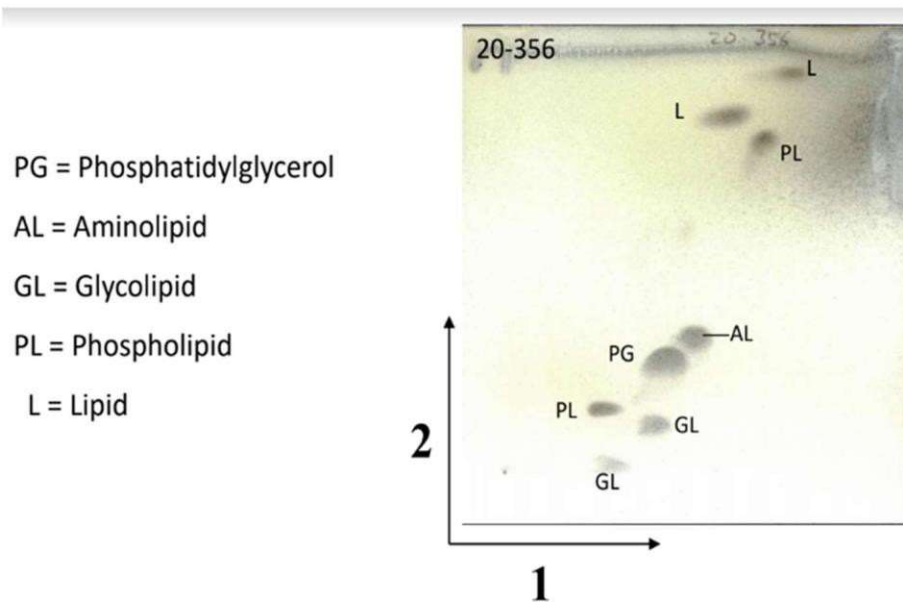

**Figure S4.** Thin-layer chromatogram of polar lipids of *Anianabacter salinae* ASV31<sup>T</sup>.

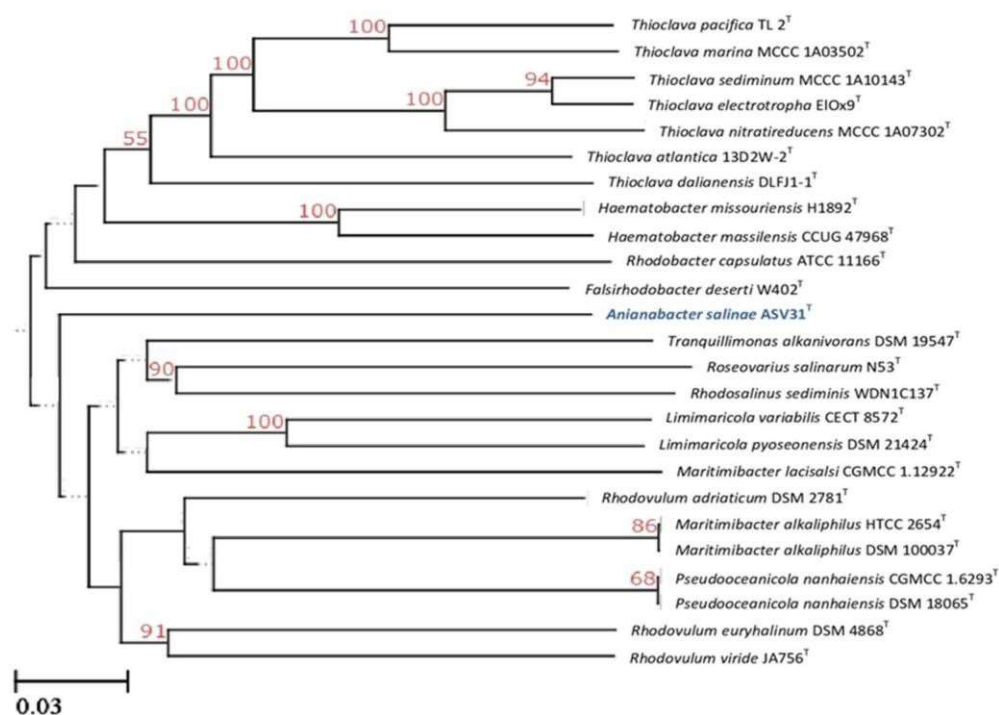

**Figure S5.** Whole-genome-based taxonomic tree, showing the position of the strain ASV31<sup>T</sup> and related strains of *Rhodobacteraceae* family. Bootstrap values greater than 50% in the clade nodes are shown. Bar, 0.03 substitutions per nucleotide position.

A

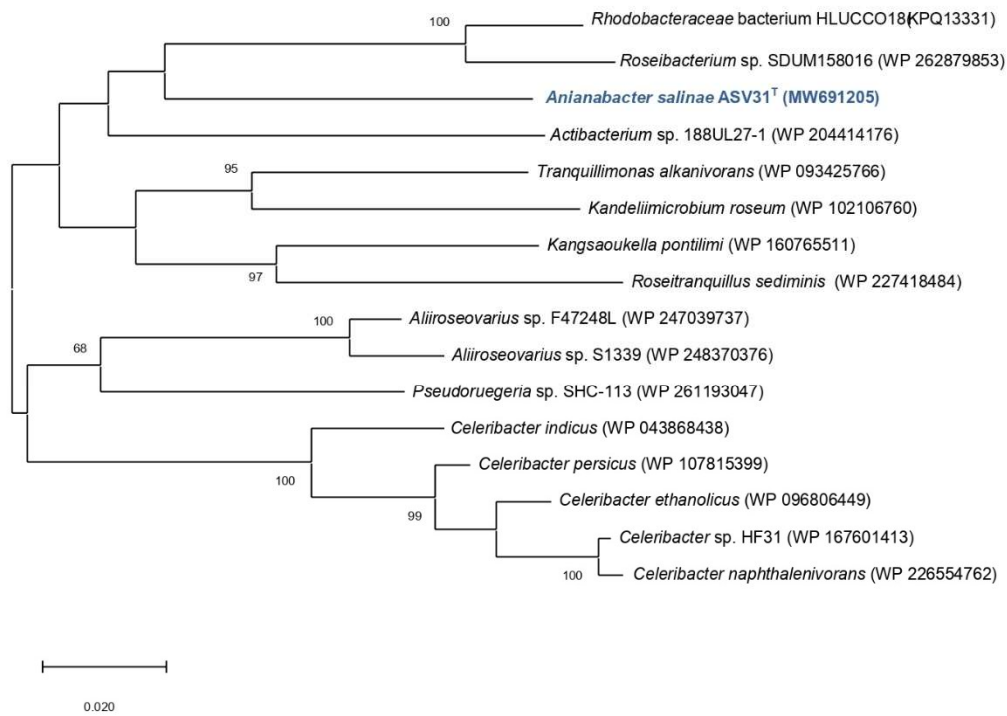

B

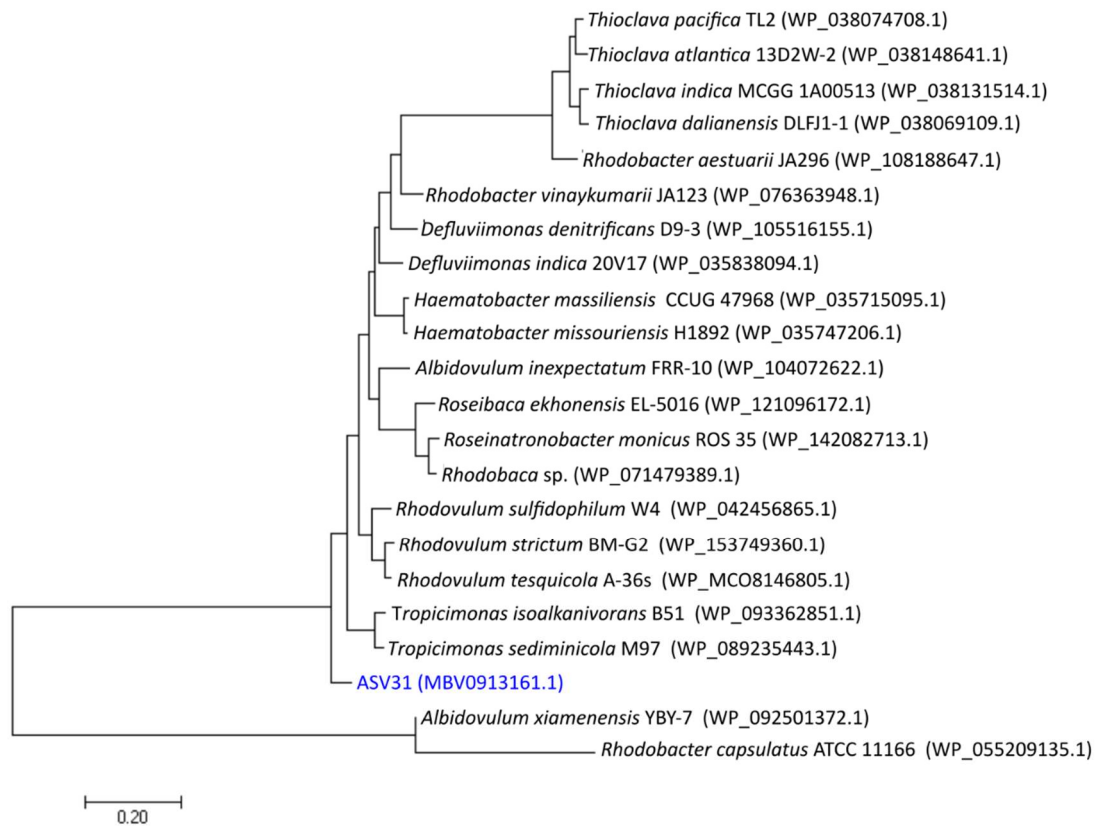

**Figure S6.** RpoC-based maximum-likelihood tree: A, performed with the most similar amino acidic sequences; B, performed with sequences from representatives of the *Rhodobacteraceae* family. Tree was generated using MEGA X. Only bootstrap values (expressed as percentages of 1000 replications) greater than 50% are shown at branching points. The scale bar indicates the number of substitutions per site

A

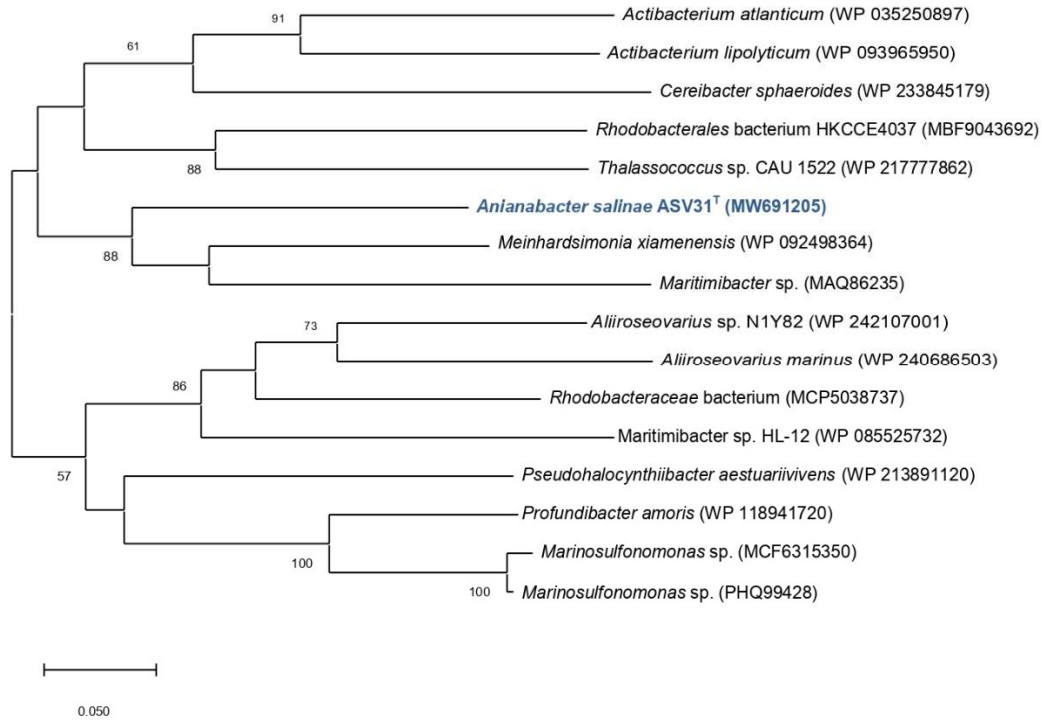

B

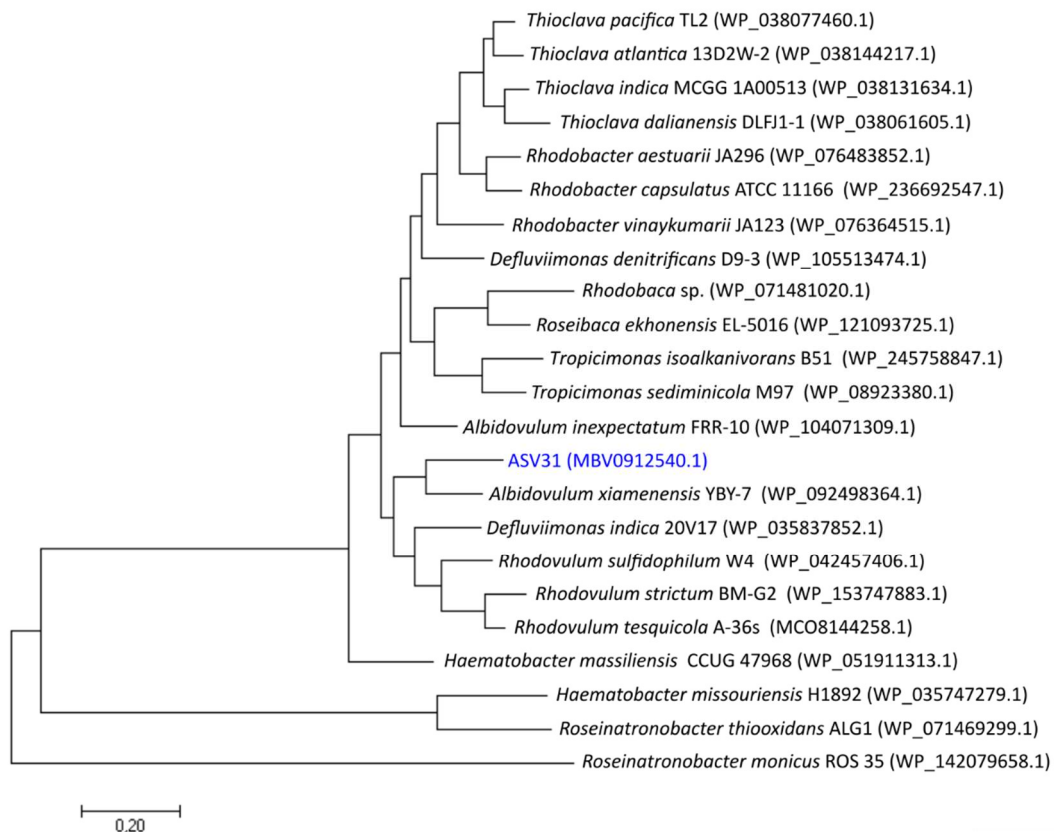

**Figure S7.** Acyl-CoA synthetase-based maximum-likelihood tree: A, performed with the most similar amino acid sequences; B, performed with sequences from representatives of the *Rhodobacteraceae* family. Tree was generated using MEGA X. Only bootstrap values (expressed as percentages of 1000 replications) greater than 50% are shown at branching points. The scale bar indicates the number of substitutions per site.



A

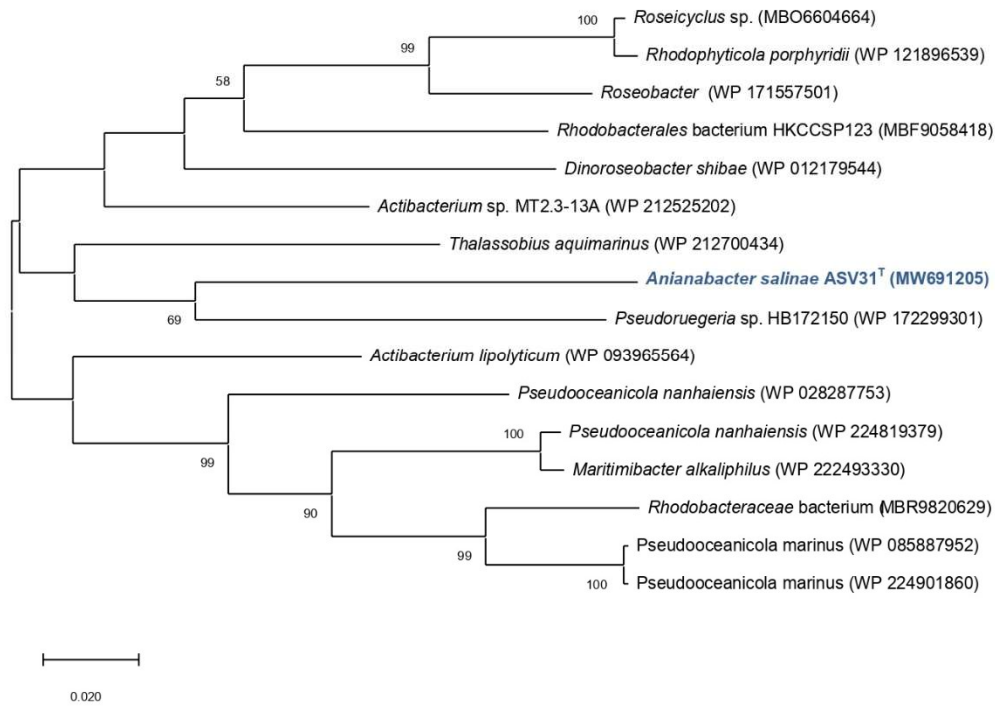

B

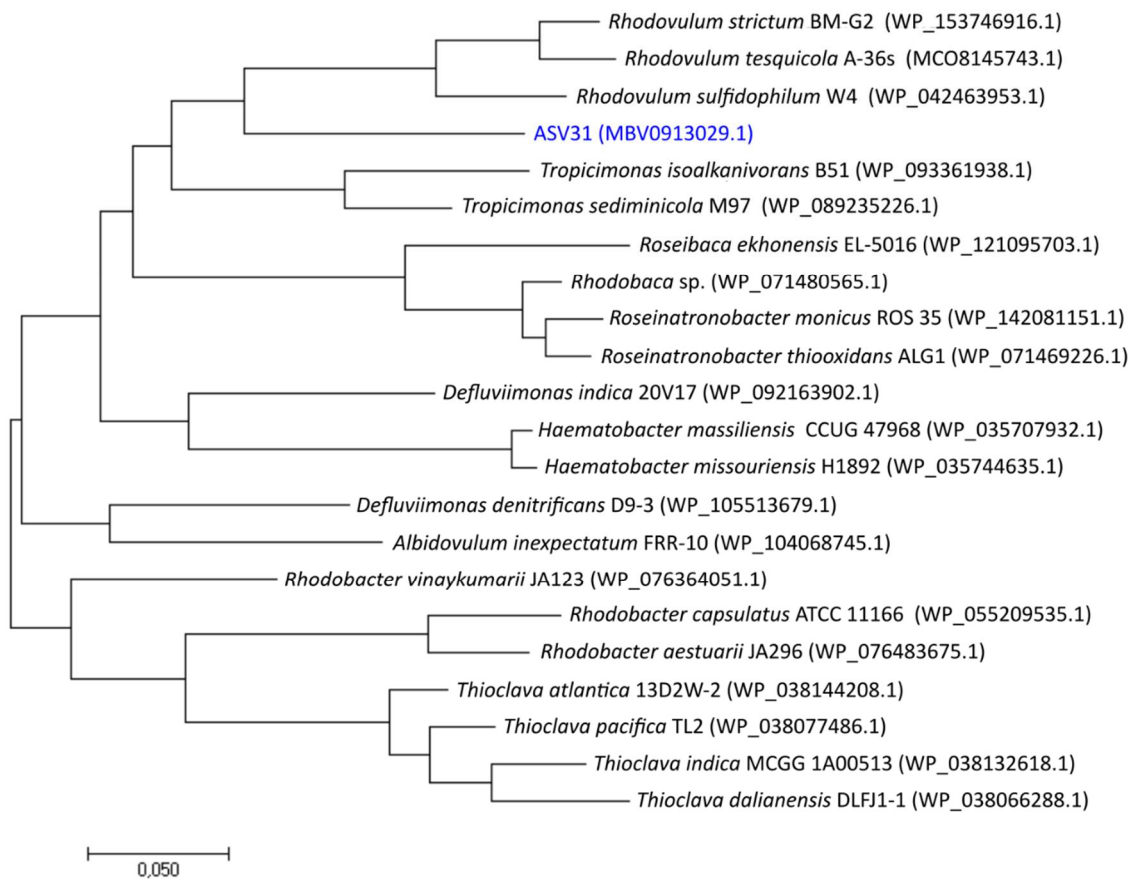

**Figure S8.** 2-oxoglutarate dehydrogenase-based maximum likelihood tree; A, performed with the most similar amino acidic sequences, B, performed with sequences from representatives of the *Rhodobacteraceae* family. Tree was generated using MEGA X. Only bootstrap values (expressed as percentages of 1000 replications) greater than 50% are shown at branching points. The scale bar indicates the number of substitutions per site.

**Table S1.** AAI and POCP matrix from pairwise whole-genome comparison. The heat map shows AAI and POCP values between strain ASV31<sup>T</sup> and type species of the closest genera in family *Rhodobacteraceae*. The darkest the green colour the higher the percentage of similarity.

| AAI                                                       |     | POCP                                          |                                                           |                                                       |                                                     |                                                    |                                                     |                                                         |                                             |                                                    |                                                     |                                               |                                                    |                                                |                                                    |                                                        |                                                     |                                                   |                                                  |                                                      |                                                    |                                                   |                                                       |                                             |                                                        |                                                 |                                                 |                                                         |                                                   |                                             |                                                 |                                                     |                                                  |                                                   |                                                          |                                                         |
|-----------------------------------------------------------|-----|-----------------------------------------------|-----------------------------------------------------------|-------------------------------------------------------|-----------------------------------------------------|----------------------------------------------------|-----------------------------------------------------|---------------------------------------------------------|---------------------------------------------|----------------------------------------------------|-----------------------------------------------------|-----------------------------------------------|----------------------------------------------------|------------------------------------------------|----------------------------------------------------|--------------------------------------------------------|-----------------------------------------------------|---------------------------------------------------|--------------------------------------------------|------------------------------------------------------|----------------------------------------------------|---------------------------------------------------|-------------------------------------------------------|---------------------------------------------|--------------------------------------------------------|-------------------------------------------------|-------------------------------------------------|---------------------------------------------------------|---------------------------------------------------|---------------------------------------------|-------------------------------------------------|-----------------------------------------------------|--------------------------------------------------|---------------------------------------------------|----------------------------------------------------------|---------------------------------------------------------|
|                                                           |     |                                               |                                                           |                                                       |                                                     |                                                    |                                                     |                                                         |                                             |                                                    |                                                     |                                               |                                                    |                                                |                                                    |                                                        |                                                     |                                                   |                                                  |                                                      |                                                    |                                                   |                                                       |                                             |                                                        |                                                 |                                                 |                                                         |                                                   |                                             |                                                 |                                                     |                                                  |                                                   |                                                          |                                                         |
|                                                           |     | <i>Ananabacter salinae</i> ASV31 <sup>T</sup> | <i>Haematobacter mazziliensis</i> CCUG 47968 <sup>T</sup> | <i>Haematobacter missouriensis</i> H1892 <sup>T</sup> | <i>Rhodobacter aestuarii</i> DSM 19945 <sup>T</sup> | <i>Rhodobacter blasticus</i> DSM 2131 <sup>T</sup> | <i>Rhodobacter capsulatus</i> DSM 1710 <sup>T</sup> | <i>Rhodobacter flagellatus</i> SYSU G03088 <sup>T</sup> | <i>Rhodobacter maris</i> JA276 <sup>T</sup> | <i>Rhodobacter sediminicola</i> JA983 <sup>T</sup> | <i>Rhodobacter thermarum</i> YIM 73036 <sup>T</sup> | <i>Rhodobacter viridis</i> JA737 <sup>T</sup> | <i>Rhodobacter xinxiangensis</i> TJ48 <sup>T</sup> | <i>Rhodovulum algae</i> LMG 29228 <sup>T</sup> | <i>Rhodovulum adriaticum</i> DSM 2781 <sup>T</sup> | <i>Rhodovulum bhavnagarense</i> DSM 24766 <sup>T</sup> | <i>Rhodovulum euryhalinum</i> DSM 4868 <sup>T</sup> | <i>Rhodovulum imhoffii</i> DSM 18064 <sup>T</sup> | <i>Rhodovulum marinum</i> DSM 18063 <sup>T</sup> | <i>Rhodovulum robiginosum</i> DSM 12329 <sup>T</sup> | <i>Rhodovulum steppense</i> DSM 21153 <sup>T</sup> | <i>Rhodovulum strictum</i> DSM 11289 <sup>T</sup> | <i>Rhodovulum sulfidophilum</i> DSM 1374 <sup>T</sup> | <i>Rhodovulum viride</i> JA756 <sup>T</sup> | <i>Rhodovulum visakhapatnamense</i> JA181 <sup>T</sup> | <i>Thioclava arenaosa</i> CAU 1312 <sup>T</sup> | <i>Thioclava atlantica</i> 13D2W-2 <sup>T</sup> | <i>Thioclava dalienensis</i> CGMCC 1.12325 <sup>T</sup> | <i>Thioclava electrotropha</i> Elox9 <sup>T</sup> | <i>Thioclava indica</i> DT23-4 <sup>T</sup> | <i>Thioclava marina</i> 11.10-0-13 <sup>T</sup> | <i>Thioclava nitrareducens</i> 25B10-4 <sup>T</sup> | <i>Thioclava pacifica</i> DSM 10166 <sup>T</sup> | <i>Thioclava sediminum</i> TAW-CT134 <sup>T</sup> | <i>Tropicimonas isokanivorans</i> DSM 19548 <sup>T</sup> | <i>Tropicimonas sediminicola</i> DSM 29339 <sup>T</sup> |
| <i>Ananabacter salinae</i> ASV31 <sup>T</sup>             | 100 | 50                                            | 49                                                        | 53                                                    | 58                                                  | 53                                                 | 58                                                  | 53                                                      | 54                                          | 58                                                 | 53                                                  | 49                                            | 54                                                 | 60                                             | 57                                                 | 59                                                     | 58                                                  | 58                                                | 62                                               | 56                                                   | 55                                                 | 54                                                | 54                                                    | 55                                          | 58                                                     | 56                                              | 55                                              | 54                                                      | 56                                                | 58                                          | 55                                              | 56                                                  | 55                                               | 52                                                | 55                                                       |                                                         |
| <i>Haematobacter mazziliensis</i> CCUG 47968 <sup>T</sup> | 60  | 100                                           | 86                                                        | 50                                                    | 54                                                  | 52                                                 | 50                                                  | 53                                                      | 56                                          | 57                                                 | 51                                                  | 57                                            | 51                                                 | 50                                             | 51                                                 | 52                                                     | 52                                                  | 54                                                | 50                                               | 53                                                   | 53                                                 | 51                                                | 50                                                    | 53                                          | 54                                                     | 56                                              | 54                                              | 50                                                      | 53                                                | 54                                          | 52                                              | 56                                                  | 51                                               | 48                                                | 47                                                       |                                                         |
| <i>Haematobacter missouriensis</i> H1892 <sup>T</sup>     | 60  | 92                                            | 100                                                       | 50                                                    | 51                                                  | 51                                                 | 51                                                  | 51                                                      | 56                                          | 53                                                 | 57                                                  | 56                                            | 51                                                 | 50                                             | 51                                                 | 51                                                     | 53                                                  | 53                                                | 50                                               | 52                                                   | 53                                                 | 51                                                | 51                                                    | 54                                          | 53                                                     | 55                                              | 53                                              | 50                                                      | 52                                                | 53                                          | 51                                              | 54                                                  | 50                                               | 49                                                | 47                                                       |                                                         |
| <i>Rhodobacter aestuarii</i> DSM 19945 <sup>T</sup>       | 61  | 61                                            | 61                                                        | 100                                                   | 61                                                  | 74                                                 | 56                                                  | 77                                                      | 59                                          | 56                                                 | 73                                                  | 49                                            | 56                                                 | 58                                             | 57                                                 | 59                                                     | 58                                                  | 57                                                | 58                                               | 57                                                   | 59                                                 | 56                                                | 57                                                    | 58                                          | 66                                                     | 61                                              | 58                                              | 60                                                      | 62                                                | 65                                          | 58                                              | 65                                                  | 61                                               | 51                                                | 51                                                       |                                                         |
| <i>Rhodobacter blasticus</i> DSM 2131 <sup>T</sup>        | 62  | 62                                            | 62                                                        | 64                                                    | 100                                                 | 64                                                 | 71                                                  | 63                                                      | 63                                          | 71                                                 | 63                                                  | 54                                            | 56                                                 | 59                                             | 59                                                 | 61                                                     | 60                                                  | 58                                                | 60                                               | 59                                                   | 61                                                 | 57                                                | 57                                                    | 58                                          | 62                                                     | 59                                              | 56                                              | 56                                                      | 59                                                | 61                                          | 57                                              | 60                                                  | 57                                               | 53                                                | 54                                                       |                                                         |
| <i>Rhodobacter capsulatus</i> DSM 1710 <sup>T</sup>       | 61  | 62                                            | 61                                                        | 78                                                    | 64                                                  | 100                                                | 58                                                  | 77                                                      | 60                                          | 58                                                 | 81                                                  | 51                                            | 56                                                 | 59                                             | 58                                                 | 60                                                     | 59                                                  | 57                                                | 58                                               | 58                                                   | 58                                                 | 58                                                | 58                                                    | 59                                          | 66                                                     | 60                                              | 58                                              | 58                                                      | 61                                                | 64                                          | 57                                              | 63                                                  | 59                                               | 49                                                | 50                                                       |                                                         |
| <i>Rhodobacter flagellatus</i> SYSU G03088 <sup>T</sup>   | 62  | 62                                            | 62                                                        | 63                                                    | 73                                                  | 64                                                 | 100                                                 | 56                                                      | 59                                          | 86                                                 | 56                                                  | 52                                            | 52                                                 | 56                                             | 57                                                 | 58                                                     | 58                                                  | 57                                                | 59                                               | 57                                                   | 58                                                 | 53                                                | 53                                                    | 54                                          | 59                                                     | 56                                              | 54                                              | 54                                                      | 57                                                | 59                                          | 55                                              | 58                                                  | 55                                               | 52                                                | 53                                                       |                                                         |
| <i>Rhodobacter maris</i> JA276 <sup>T</sup>               | 61  | 61                                            | 61                                                        | 82                                                    | 64                                                  | 78                                                 | 63                                                  | 100                                                     | 59                                          | 57                                                 | 75                                                  | 50                                            | 56                                                 | 59                                             | 58                                                 | 58                                                     | 58                                                  | 59                                                | 57                                               | 58                                                   | 59                                                 | 57                                                | 59                                                    | 61                                          | 65                                                     | 62                                              | 59                                              | 59                                                      | 62                                                | 65                                          | 59                                              | 65                                                  | 60                                               | 51                                                | 51                                                       |                                                         |
| <i>Rhodobacter sediminicola</i> JA983 <sup>T</sup>        | 63  | 64                                            | 64                                                        | 64                                                    | 67                                                  | 65                                                 | 68                                                  | 64                                                      | 100                                         | 60                                                 | 58                                                  | 55                                            | 57                                                 | 58                                             | 60                                                 | 62                                                     | 61                                                  | 58                                                | 60                                               | 61                                                   | 62                                                 | 58                                                | 56                                                    | 61                                          | 59                                                     | 58                                              | 54                                              | 56                                                      | 58                                                | 59                                          | 55                                              | 57                                                  | 56                                               | 55                                                | 52                                                       |                                                         |
| <i>Rhodobacter thermarum</i> YIM 73036 <sup>T</sup>       | 62  | 62                                            | 62                                                        | 63                                                    | 72                                                  | 63                                                 | 86                                                  | 63                                                      | 68                                          | 100                                                | 57                                                  | 52                                            | 52                                                 | 57                                             | 58                                                 | 59                                                     | 58                                                  | 57                                                | 60                                               | 57                                                   | 58                                                 | 53                                                | 53                                                    | 57                                          | 59                                                     | 58                                              | 55                                              | 54                                                      | 58                                                | 59                                          | 57                                              | 59                                                  | 55                                               | 53                                                | 53                                                       |                                                         |
| <i>Rhodobacter viridis</i> JA737 <sup>T</sup>             | 61  | 61                                            | 61                                                        | 78                                                    | 64                                                  | 89                                                 | 63                                                  | 78                                                      | 64                                          | 63                                                 | 100                                                 | 50                                            | 54                                                 | 57                                             | 56                                                 | 58                                                     | 57                                                  | 56                                                | 57                                               | 56                                                   | 57                                                 | 56                                                | 58                                                    | 54                                          | 56                                                     | 57                                              | 65                                              | 60                                                      | 57                                                | 61                                          | 64                                              | 57                                                  | 62                                               | 59                                                | 49                                                       | 50                                                      |
| <i>Rhodobacter xinxiangensis</i> TJ48 <sup>T</sup>        | 60  | 63                                            | 63                                                        | 61                                                    | 64                                                  | 61                                                 | 64                                                  | 61                                                      | 66                                          | 63                                                 | 61                                                  | 100                                           | 48                                                 | 48                                             | 49                                                 | 50                                                     | 50                                                  | 49                                                | 49                                               | 49                                                   | 49                                                 | 49                                                | 48                                                    | 49                                          | 50                                                     | 62                                              | 51                                              | 52                                                      | 50                                                | 51                                          | 53                                              | 50                                                  | 52                                               | 51                                                | 45                                                       | 46                                                      |
| <i>Rhodovulum algae</i> LMG 29228 <sup>T</sup>            | 64  | 61                                            | 62                                                        | 62                                                    | 62                                                  | 62                                                 | 62                                                  | 62                                                      | 63                                          | 62                                                 | 62                                                  | 60                                            | 100                                                | 63                                             | 61                                                 | 66                                                     | 61                                                  | 64                                                | 62                                               | 64                                                   | 63                                                 | 85                                                | 78                                                    | 77                                          | 56                                                     | 54                                              | 52                                              | 52                                                      | 54                                                | 56                                          | 52                                              | 55                                                  | 53                                               | 50                                                | 51                                                       |                                                         |
| <i>Rhodovulum adriaticum</i> DSM 2781 <sup>T</sup>        | 65  | 61                                            | 61                                                        | 62                                                    | 63                                                  | 63                                                 | 62                                                  | 62                                                      | 64                                          | 63                                                 | 62                                                  | 61                                            | 73                                                 | 100                                            | 77                                                 | 71                                                     | 67                                                  | 71                                                | 69                                               | 68                                                   | 67                                                 | 64                                                | 63                                                    | 65                                          | 61                                                     | 59                                              | 54                                              | 55                                                      | 58                                                | 60                                          | 56                                              | 60                                                  | 56                                               | 53                                                | 53                                                       |                                                         |
| <i>Rhodovulum bhavnagarense</i> DSM 24766 <sup>T</sup>    | 65  | 62                                            | 62                                                        | 62                                                    | 63                                                  | 62                                                 | 63                                                  | 63                                                      | 65                                          | 63                                                 | 62                                                  | 61                                            | 73                                                 | 83                                             | 100                                                | 69                                                     | 69                                                  | 68                                                | 68                                               | 69                                                   | 67                                                 | 62                                                | 61                                                    | 64                                          | 62                                                     | 58                                              | 54                                              | 53                                                      | 57                                                | 59                                          | 55                                              | 59                                                  | 54                                               | 54                                                | 52                                                       |                                                         |
| <i>Rhodovulum euryhalinum</i> DSM 4868 <sup>T</sup>       | 65  | 62                                            | 62                                                        | 62                                                    | 64                                                  | 63                                                 | 63                                                  | 63                                                      | 65                                          | 64                                                 | 62                                                  | 61                                            | 74                                                 | 76                                             | 76                                                 | 100                                                    | 68                                                  | 78                                                | 72                                               | 77                                                   | 77                                                 | 68                                                | 69                                                    | 71                                          | 61                                                     | 58                                              | 54                                              | 57                                                      | 58                                                | 61                                          | 56                                              | 60                                                  | 57                                               | 56                                                | 57                                                       |                                                         |
| <i>Rhodovulum imhoffii</i> DSM 18064 <sup>T</sup>         | 64  | 62                                            | 62                                                        | 62                                                    | 62                                                  | 62                                                 | 62                                                  | 62                                                      | 65                                          | 62                                                 | 61                                                  | 61                                            | 70                                                 | 71                                             | 72                                                 | 71                                                     | 100                                                 | 65                                                | 69                                               | 65                                                   | 67                                                 | 63                                                | 62                                                    | 65                                          | 64                                                     | 58                                              | 54                                              | 55                                                      | 58                                                | 60                                          | 56                                              | 59                                                  | 56                                               | 55                                                | 52                                                       |                                                         |
| <i>Rhodovulum marinum</i> DSM 18063 <sup>T</sup>          | 66  | 62                                            | 62                                                        | 62                                                    | 63                                                  | 63                                                 | 63                                                  | 63                                                      | 64                                          | 63                                                 | 62                                                  | 61                                            | 74                                                 | 77                                             | 77                                                 | 83                                                     | 72                                                  | 100                                               | 70                                               | 75                                                   | 72                                                 | 65                                                | 67                                                    | 69                                          | 61                                                     | 59                                              | 55                                              | 56                                                      | 58                                                | 62                                          | 58                                              | 62                                                  | 57                                               | 55                                                | 56                                                       |                                                         |
| <i>Rhodovulum robiginosum</i> DSM 12329 <sup>T</sup>      | 66  | 61                                            | 62                                                        | 62                                                    | 63                                                  | 63                                                 | 63                                                  | 62                                                      | 65                                          | 63                                                 | 62                                                  | 61                                            | 71                                                 | 75                                             | 74                                                 | 75                                                     | 73                                                  | 75                                                | 100                                              | 67                                                   | 67                                                 | 62                                                | 62                                                    | 65                                          | 62                                                     | 60                                              | 54                                              | 58                                                      | 58                                                | 62                                          | 58                                              | 60                                                  | 59                                               | 58                                                | 58                                                       |                                                         |
| <i>Rhodovulum steppense</i> DSM 21153 <sup>T</sup>        | 65  | 62                                            | 62                                                        | 62                                                    | 63                                                  | 62                                                 | 63                                                  | 63                                                      | 65                                          | 63                                                 | 62                                                  | 61                                            | 73                                                 | 75                                             | 75                                                 | 83                                                     | 71                                                  | 81                                                | 73                                               | 100                                                  | 81                                                 | 65                                                | 65                                                    | 69                                          | 60                                                     | 58                                              | 53                                              | 54                                                      | 56                                                | 60                                          | 55                                              | 57                                                  | 55                                               | 53                                                | 54                                                       |                                                         |
| <i>Rhodovulum strictum</i> DSM 11289 <sup>T</sup>         | 64  | 62                                            | 61                                                        | 62                                                    | 63                                                  | 62                                                 | 64                                                  | 63                                                      | 66                                          | 64                                                 | 62                                                  | 61                                            | 73                                                 | 75                                             | 75                                                 | 82                                                     | 70                                                  | 80                                                | 73                                               | 90                                                   | 100                                                | 64                                                | 65                                                    | 69                                          | 60                                                     | 58                                              | 53                                              | 53                                                      | 55                                                | 58                                          | 54                                              | 59                                                  | 54                                               | 55                                                | 53                                                       |                                                         |
| <i>Rhodovulum sulfidophilum</i> DSM 1374 <sup>T</sup>     | 64  | 61                                            | 61                                                        | 62                                                    | 62                                                  | 62                                                 | 62                                                  | 62                                                      | 64                                          | 62                                                 | 62                                                  | 60                                            | 92                                                 | 73                                             | 73                                                 | 75                                                     | 70                                                  | 74                                                | 72                                               | 74                                                   | 73                                                 | 100                                               | 79                                                    | 78                                          | 56                                                     | 54                                              | 52                                              | 52                                                      | 55                                                | 56                                          | 52                                              | 56                                                  | 53                                               | 50                                                | 52                                                       |                                                         |
| <i>Rhodovulum viride</i> JA756 <sup>T</sup>               | 64  | 61                                            | 61                                                        | 62                                                    | 63                                                  | 63                                                 | 62                                                  | 63                                                      | 64                                          | 62                                                 | 62                                                  | 60                                            | 87                                                 | 74                                             | 73                                                 | 75                                                     | 70                                                  | 75                                                | 72                                               | 74                                                   | 74                                                 | 87                                                | 100                                                   | 86                                          | 55                                                     | 54                                              | 53                                              | 53                                                      | 54                                                | 56                                          | 53                                              | 55                                                  | 53                                               | 51                                                | 52                                                       |                                                         |
| <i>Rhodovulum visakhapatnamense</i> JA181 <sup>T</sup>    | 64  | 62                                            | 62                                                        | 62                                                    | 63                                                  | 62                                                 | 63                                                  | 65                                                      | 63                                          | 62                                                 | 61                                                  | 86                                            | 73                                                 | 74                                             | 75                                                 | 70                                                     | 75                                                  | 72                                                | 75                                               | 74                                                   | 87                                                 | 95                                                | 100                                                   | 65                                          | 58                                                     | 55                                              | 55                                              | 56                                                      | 58                                                | 55                                          | 58                                              | 55                                                  | 55                                               | 53                                                | 53                                                       |                                                         |
| <i>Thioclava arenaosa</i> CAU 1312 <sup>T</sup>           | 63  | 63                                            | 62                                                        | 71                                                    | 64                                                  | 71                                                 | 64                                                  | 71                                                      | 65                                          | 64                                                 | 71                                                  | 63                                            | 63                                                 | 64                                             | 64                                                 | 64                                                     | 63                                                  | 64                                                | 64                                               | 64                                                   | 63                                                 | 63                                                | 63                                                    | 100                                         | 67                                                     | 62                                              | 65                                              | 69                                                      | 75                                                | 65                                          | 73                                              | 67                                                  | 53                                               | 55                                                |                                                          |                                                         |
| <i>Thioclava atlantica</i> 13D2W-2 <sup>T</sup>           | 62  | 62                                            | 62                                                        | 68                                                    | 63                                                  | 68                                                 | 62                                                  | 68                                                      | 63                                          | 62                                                 | 68                                                  | 61                                            | 62                                                 | 61                                             | 63                                                 | 63                                                     | 62                                                  | 63                                                | 63                                               | 63                                                   | 62                                                 | 62                                                | 62                                                    | 63                                          | 71                                                     | 100                                             | 70                                              | 78                                                      | 71                                                | 78                                          | 78                                              | 78                                                  | 55                                               | 55                                                |                                                          |                                                         |
| <i>Thioclava dalienensis</i> CGMCC 1.12325 <sup>T</sup>   | 61  | 60                                            | 60                                                        | 66                                                    | 61                                                  | 67                                                 | 61                                                  | 66                                                      | 62                                          | 61                                                 | 66                                                  | 60                                            | 60                                                 | 62                                             | 62                                                 | 61                                                     | 61                                                  | 62                                                | 62                                               | 62                                                   | 62                                                 | 61                                                | 61                                                    | 62                                          | 70                                                     | 71                                              | 100                                             | 69                                                      | 70                                                | 68                                          | 69                                              | 69                                                  | 53                                               | 52                                                |                                                          |                                                         |
| <i>Thioclava electrotropha</i> Elox9 <sup>T</sup>         | 61  | 60                                            | 60                                                        | 67                                                    | 62                                                  | 67                                                 | 61                                                  | 67                                                      | 62                                          | 61                                                 | 67                                                  | 60                                            | 62                                                 | 62                                             | 62                                                 | 62                                                     | 62                                                  | 62                                                | 62                                               | 62                                                   | 62                                                 | 62                                                | 62                                                    | 71                                          | 81                                                     | 76                                              | 100                                             | 72                                                      | 78                                                | 83                                          | 77                                              | 91                                                  | 53                                               | 54                                                |                                                          |                                                         |
| <i>Thioclava indica</i> DT23-4 <sup>T</sup>               | 60  | 60                                            | 60                                                        | 68                                                    | 62                                                  | 68                                                 | 62                                                  | 68                                                      | 62                                          | 62                                                 | 67                                                  | 60                                            | 61                                                 | 62                                             | 62                                                 | 62                                                     | 62                                                  | 62                                                | 62                                               | 62                                                   | 62                                                 | 62                                                | 61                                                    | 61                                          | 61                                                     | 71                                              | 77                                              | 79                                                      | 77                                                | 100                                         | 76                                              | 73                                                  | 74                                               | 73                                                | 53                                                       | 55                                                      |
| <i>Thioclava marina</i> 11.10-0-13 <sup>T</sup>           | 62  | 61                                            | 61                                                        | 69                                                    | 63                                                  | 69                                                 | 63                                                  | 69                                                      | 63                                          | 62                                                 | 68                                                  | 61                                            | 62                                                 | 63                                             | 63                                                 | 63                                                     | 62                                                  | 63                                                | 63                                               | 63                                                   | 63                                                 | 62                                                | 62                                                    | 63                                          | 73                                                     | 83                                              | 76                                              | 84                                                      | 79                                                | 100                                         | 77                                              | 88                                                  | 80                                               | 54                                                | 55                                                       |                                                         |
| <i>Thioclava nitrareducens</i> 25B10-4 <sup>T</sup>       | 61  | 60                                            | 60                                                        | 67                                                    | 62                                                  | 67                                                 | 62                                                  | 67                                                      | 62                                          | 61                                                 | 67                                                  | 60                                            | 61                                                 | 63                                             | 62                                                 | 62                                                     | 62                                                  | 62                                                | 62                                               | 62                                                   | 62                                                 | 62                                                | 61                                                    | 61                                          | 61                                                     | 71                                              | 81                                              | 76                                                      | 93                                                | 77                                          | 83                                              | 100                                                 | 76                                               | 83                                                | 54                                                       | 53                                                      |
| <i>Thioclava pacifica</i> DSM 10166 <sup>T</sup>          | 61  | 62                                            | 61                                                        | 69                                                    | 62                                                  | 69                                                 | 62                                                  | 69                                                      | 64                                          | 62                                                 | 68                                                  | 61                                            | 62                                                 | 63                                             | 63                                                 | 63                                                     | 62                                                  | 63                                                | 63                                               | 63                                                   | 63                                                 | 62                                                | 62                                                    | 63                                          | 73                                                     | 83                                              | 77                                              | 83                                                      | 78                                                | 94                                          | 82                                              | 100                                                 | 79                                               | 54                                                | 55                                                       |                                                         |
| <i>Thioclava sediminum</i> TAW-CT134 <sup>T</sup>         | 61  | 60                                            | 60                                                        | 68                                                    | 62                                                  | 67                                                 | 61                                                  | 67                                                      | 62                                          | 61                                                 | 67                                                  | 60                                            | 61                                                 | 62                                             | 62                                                 | 62                                                     | 61                                                  | 62                                                | 62                                               | 62                                                   | 62                                                 | 62                                                | 62                                                    | 71                                          | 81                                                     | 76                                              | 98                                              | 77                                                      | 84                                                | 94                                          | 84                                              | 100                                                 | 53                                               | 55                                                |                                                          |                                                         |
| <i>Tropicimonas isokanivorans</i> DSM 19548 <sup>T</sup>  | 62  | 59                                            | 59                                                        | 60                                                    | 60                                                  | 59                                                 | 61                                                  | 60                                                      | 62                                          | 61                                                 | 59                                                  | 58                                            | 61                                                 | 65                                             | 64                                                 | 64                                                     | 65                                                  | 64                                                | 65                                               | 64                                                   | 64                                                 | 62                                                | 62                                                    | 63                                          | 62                                                     | 61                                              | 60                                              | 60                                                      | 60                                                | 60                                          | 61                                              | 61                                                  | 60                                               | 100                                               | 64                                                       |                                                         |
| <i>Tropicimonas sediminicola</i> DSM 29339 <sup>T</sup>   | 62  | 59                                            | 59                                                        | 60                                                    | 61                                                  | 60                                                 | 61                                                  | 60                                                      | 61                                          | 61                                                 | 60                                                  | 58                                            | 62                                                 | 64                                             | 64                                                 | 64                                                     | 63                                                  | 64                                                | 54                                               | 64                                                   | 63                                                 | 62                                                | 63                                                    | 63                                          | 62                                                     | 61                                              | 60                                              | 60                                                      | 60                                                | 61                                          | 60                                              | 61                                                  | 60                                               | 75                                                | 100                                                      |                                                         |



**Table S2.** Presence and absence of subsystems in strain ASV31<sup>T</sup> compared to its closest relatives (*Thioclava pacifica* DSM 10166<sup>T</sup>, *Rhodovulum algae* LMG 29228<sup>T</sup>, *Tropicimonas isoalkanivorans* B51<sup>T</sup> and *Haematobacter massiliensis* CCUG 47968<sup>T</sup>).

| Only present in ASV31 <sup>T</sup> (not in relatives) |                                                                   |                                                                |                                                                               |
|-------------------------------------------------------|-------------------------------------------------------------------|----------------------------------------------------------------|-------------------------------------------------------------------------------|
| Category                                              | Subcategory                                                       | Subsystem                                                      | Role                                                                          |
| Amino Acids and Derivatives                           | Aromatic amino acids and derivatives                              | Aromatic amino acid degradation                                | 2-oxo-hepta-3-ene-1,7-dioic acid hydratase (EC 4.2.-.-)                       |
|                                                       |                                                                   |                                                                | Homoprotocatechuate degradative operon repressor                              |
|                                                       | Alanine, serine, and glycine                                      | Glycine and Serine Utilization                                 | Cystathionine gamma-lyase (EC 4.4.1.1)                                        |
|                                                       | Arginine; urea cycle, polyamines                                  | Urea carboxylase and Allophanate hydrolase cluster             | Allophanate hydrolase (EC 3.5.1.54)                                           |
| Carbohydrates                                         | Central carbohydrate metabolism                                   | Pyruvate metabolism II: acetyl-CoA, acetogenesis from pyruvate | Dihydrolipoamide dehydrogenase of pyruvate dehydrogenase complex (EC 1.8.1.4) |
| Clustering-based subsystems                           | May be related to ADP-phosphoribose and NAD-dependent acetylation | CBSS-216591.1.peg.168                                          | MaoC domain protein dehydratase                                               |
|                                                       | Clustering-based subsystems                                       | CBSS-292415.3.peg.2341                                         | Major facilitator superfamily (MFS) transporter                               |
|                                                       | no subcategory                                                    | CBSS-296591.1.peg.2330                                         | Alpha-1,3-N-acetylgalactosamine transferase PgIA (EC 2.4.1.-)                 |
|                                                       |                                                                   |                                                                | Lipid carrier : UDP-N-acetylgalactosaminyltransferase (EC 2.4.1.-)            |
|                                                       |                                                                   |                                                                | Putative glycosyltransferase                                                  |
|                                                       | tRNA sulfuration                                                  | CBSS-89187.3.peg.2957                                          | hypothetical protein SKA53_09994                                              |
| Cofactors, Vitamins, Prosthetic Groups, Pigments      | Tetrapyrroles                                                     | Cobalamin synthesis                                            | Cobalt-precorrin-6x reductase (EC 1.3.1.54)                                   |
| Fatty Acids, Lipids, and Isoprenoids                  | Fatty acids                                                       | Fatty Acid Biosynthesis FASII                                  | Biotin carboxyl carrier protein                                               |
| Membrane Transport                                    | TRAP transporters                                                 | TRAP Transporter unknown substrate 4                           | TRAP dicarboxylate transporter, DctM subunit, unknown substrate 4             |
|                                                       |                                                                   |                                                                | TRAP dicarboxylate transporter, DctQ subunit, unknown substrate 4             |
|                                                       |                                                                   |                                                                | TRAP transporter solute receptor, unknown substrate 4                         |
|                                                       |                                                                   | TRAP Transporter unknown substrate 7                           | TRAP dicarboxylate transporter, DctQ subunit, unknown substrate 7             |
|                                                       |                                                                   |                                                                | TRAP transporter solute receptor, unknown substrate 7                         |

|                                  |                                                          |                                                                |                                                                                |
|----------------------------------|----------------------------------------------------------|----------------------------------------------------------------|--------------------------------------------------------------------------------|
| Metabolism of Aromatic Compounds | no subcategory                                           | Aromatic Amin Catabolism                                       | 3,4-dihydroxyphenylacetate 2,3-dioxygenase (EC 1.13.11.15)                     |
|                                  | Peripheral pathways for catabolism of aromatic compounds | Benzoate degradation                                           | Ortho-halobenzoate 1,2-dioxygenase alpha-ISP protein OhbB                      |
|                                  |                                                          |                                                                | Ortho-halobenzoate 1,2-dioxygenase beta-ISP protein OhbA                       |
|                                  | Metabolism of central aromatic intermediates             | Catechol branch of beta-ketoadipate pathway                    | Catechol 1,2-dioxygenase (EC 1.13.11.1)                                        |
|                                  |                                                          | Central meta-cleavage pathway of aromatic compound degradation | Muconolactone isomerase (EC 5.3.3.4), putative                                 |
| Miscellaneous                    | no subcategory                                           | Lignin degradation fragments                                   | 3-hydroxyisobutyrate dehydrogenase and related beta-hydroxyacid dehydrogenases |
|                                  |                                                          |                                                                | 4-carboxy-4-hydroxy-2-oxoadipate aldolase (EC 4.1.3.17)                        |
| Nitrogen Metabolism              | no subcategory                                           | Cyanate hydrolysis                                             | Cyanate ABC transporter, ATP-binding protein                                   |
|                                  |                                                          |                                                                | Cyanate ABC transporter, permease protein                                      |
|                                  |                                                          |                                                                | Cyanate ABC transporter, substrate binding protein                             |
| Protein Metabolism               | Protein processing and modification                      | N-linked Glycosylation in Bacteria                             | Alpha-1,4-N-acetylgalactosamine transferase PglI (EC 2.4.1.-)                  |
|                                  |                                                          |                                                                | Phospholipid-lipopolysaccharide ABC transporter                                |
| Regulation and Cell signalling   | no subcategory                                           | cAMP signalling in bacteria                                    | 3',5'-cyclic-nucleotide phosphodiesterase (EC 3.1.4.17)                        |
| Respiration                      | Electron accepting reactions                             | Anaerobic respiratory reductases                               | Vanillate O-demethylase oxidoreductase (EC 1.14.13.-)                          |
|                                  | no subcategory                                           | Carbon monoxide dehydrogenase maturation factors               | Carbon monoxide oxidation accessory protein CoxD                               |
|                                  |                                                          | Soluble cytochromes and functionally related electron carriers | Carbon monoxide oxidation accessory protein CoxE                               |
| RNA Metabolism                   | RNA processing and modification                          | RNA methylation                                                | tRNA (adenine37-N(6))-methyltransferase TrmN6 (EC 2.1.1.223)                   |
| Stress Response                  | Periplasmic Stress                                       | Periplasmic Stress Response                                    | Outer membrane protein H precursor                                             |
| Virulence, Disease and Defence   | Resistance to antibiotics and toxic compounds            | Zinc resistance                                                | Response regulator of zinc sigma-54-dependent two-component system             |

| Only present in all relatives (not in ASV31 <sup>T</sup> ) |                                             |                                                          |                                                                            |
|------------------------------------------------------------|---------------------------------------------|----------------------------------------------------------|----------------------------------------------------------------------------|
| Category                                                   | Subcategory                                 | Subsystem                                                | Role                                                                       |
| Amino Acids and Derivatives                                | no subcategory                              | Creatine and Creatinine Degradation                      | Cytosine deaminase (EC 3.5.4.1)                                            |
|                                                            | Lysine, threonine, methionine, and cysteine | Cysteine Biosynthesis                                    | Cysteine synthase (EC 2.5.1.47)                                            |
| Carbohydrates                                              | CO2 fixation                                | CO2 uptake, carboxysome                                  | Ribulose biphosphate carboxylase large chain (EC 4.1.1.39)                 |
|                                                            |                                             |                                                          | Ribulose biphosphate carboxylase small chain (EC 4.1.1.39)                 |
|                                                            |                                             |                                                          | RuBisCO operon transcriptional regulator CbbR                              |
|                                                            | Sugar alcohols                              | Glycerol and Glycerol-3-phosphate Uptake and Utilization | Glycerol-3-phosphate ABC transporter, permease protein UgpE (TC 3.A.1.1.3) |
|                                                            | Central carbohydrate metabolism             | Glycolysis and Gluconeogenesis                           | Fructose-1,6-bisphosphatase, type I (EC 3.1.3.11)                          |
|                                                            |                                             |                                                          | Fructose-bisphosphate aldolase class II (EC 4.1.2.13)                      |
| Clustering-based subsystems                                | no subcategory                              | LMPTP YfkJ cluster                                       | Low molecular weight protein tyrosine phosphatase (EC 3.1.3.48)            |
| Cofactors, Vitamins, Prosthetic Groups, Pigments           | Coenzyme A                                  | Coenzyme A Biosynthesis                                  | Pantoate--beta-alanine ligase (EC 6.3.2.1)                                 |
| Membrane Transport                                         | Cation transporters                         | Magnesium transport                                      | Magnesium and cobalt transport protein CorA                                |
| Miscellaneous                                              | no subcategory                              | Broadly distributed proteins not in subsystems           | YciL protein                                                               |
| Motility and Chemotaxis                                    | Flagellar motility in Prokaryota            | Flagellar motility                                       | Flagellar L-ring protein FlgH                                              |
|                                                            |                                             |                                                          | Flagellar biosynthesis protein FlhA                                        |
|                                                            |                                             |                                                          | Flagellar biosynthesis protein FlhB                                        |
|                                                            |                                             |                                                          | Flagellar biosynthesis protein FliR                                        |
|                                                            |                                             |                                                          | Flagellar motor rotation protein MotA                                      |
|                                                            |                                             |                                                          | Flagellar motor switch protein FliN                                        |
|                                                            |                                             |                                                          | Flagellum-specific ATP synthase FliI                                       |
|                                                            |                                             | Flagellum in Campylobacter                               | Flagellar basal-body rod protein FlgB                                      |
|                                                            |                                             |                                                          | Flagellar basal-body rod protein FlgC                                      |
|                                                            |                                             |                                                          | Flagellar hook-basal body complex protein FliE                             |
|                                                            |                                             |                                                          | Flagellin protein FlaA                                                     |
| Phages, Prophages, Transposable elements,                  | Gene Transfer Agent (GTA)                   | Gene Transfer Agent                                      | Gene Transfer Agent (GTA) ORFG06                                           |

|                       |                      |                      |                                                       |
|-----------------------|----------------------|----------------------|-------------------------------------------------------|
| Plasmids              |                      |                      |                                                       |
| Phosphorus Metabolism | no subcategory       | Phosphate metabolism | Probable low-affinity inorganic phosphate transporter |
| Protein Metabolism    | Protein biosynthesis | tRNAs                | tRNA-Ala-CGC                                          |

**Table S3.** CAZyme types present in ASV31<sup>T</sup> strain.

| CAZyme category                   | Families | Known CAZyme activities                                                                                                                                                                                                                                                                                                                                                                                                                                                                                                                                                                                                                                                                                                                                                                                                                                                                                                                                                                                                                                                                                                                            |
|-----------------------------------|----------|----------------------------------------------------------------------------------------------------------------------------------------------------------------------------------------------------------------------------------------------------------------------------------------------------------------------------------------------------------------------------------------------------------------------------------------------------------------------------------------------------------------------------------------------------------------------------------------------------------------------------------------------------------------------------------------------------------------------------------------------------------------------------------------------------------------------------------------------------------------------------------------------------------------------------------------------------------------------------------------------------------------------------------------------------------------------------------------------------------------------------------------------------|
| Auxiliary Activity (AA)           | 2        | manganese peroxidase (EC 1.11.1.13); versatile peroxidase (EC 1.11.1.16); lignin peroxidase (EC 1.11.1.14); peroxidase (EC 1.11.1.-); cytochrome-c peroxidase (EC 1.11.1.5); ascorbate peroxidase (EC 1.11.1.11)                                                                                                                                                                                                                                                                                                                                                                                                                                                                                                                                                                                                                                                                                                                                                                                                                                                                                                                                   |
|                                   | 3        | cellobiose dehydrogenase (EC 1.1.99.18); glucose 1-oxidase (EC 1.1.3.4); aryl alcohol oxidase (EC 1.1.3.7); alcohol oxidase (EC 1.1.3.13); pyranose oxidase (EC 1.1.3.10); glucose 1-dehydrogenase (FAD, quinone) (EC 1.1.5.9); pyranose dehydrogenase (EC 1.1.99.29); oligosaccharide dehydrogenase (FAD) (EC 1.1.5.-)                                                                                                                                                                                                                                                                                                                                                                                                                                                                                                                                                                                                                                                                                                                                                                                                                            |
|                                   | 3_2      | ecdysone oxidase (EC 1.1.3.16); glucose 1-oxidase (EC 1.1.3.4); aryl alcohol oxidase (EC 1.1.3.7); oligosaccharide dehydrogenase (FAD) (EC 1.1.5.-); glucose 1-dehydrogenase (FAD, quinone) (EC 1.1.5.9); pyranose dehydrogenase (EC 1.1.99.29)                                                                                                                                                                                                                                                                                                                                                                                                                                                                                                                                                                                                                                                                                                                                                                                                                                                                                                    |
|                                   | 4        | vanillyl-alcohol oxidase (EC 1.1.3.38)                                                                                                                                                                                                                                                                                                                                                                                                                                                                                                                                                                                                                                                                                                                                                                                                                                                                                                                                                                                                                                                                                                             |
|                                   | 6        | 1,4-benzoquinone reductase (EC 1.6.5.6)                                                                                                                                                                                                                                                                                                                                                                                                                                                                                                                                                                                                                                                                                                                                                                                                                                                                                                                                                                                                                                                                                                            |
|                                   | 7        | glucooligosaccharide oxidase (EC 1.1.3.-); chitooligosaccharide oxidase (EC 1.1.3.-); celooligosaccharide dehydrogenase (EC 1.1.99.-)                                                                                                                                                                                                                                                                                                                                                                                                                                                                                                                                                                                                                                                                                                                                                                                                                                                                                                                                                                                                              |
| Carbohydrate-Binding Module (CBM) | 48       | Modules of approx. 100 residues with glycogen-binding function, appended to GH13 modules. Also found in the beta subunit (glycogen-binding) of AMP-activated protein kinases (AMPK)                                                                                                                                                                                                                                                                                                                                                                                                                                                                                                                                                                                                                                                                                                                                                                                                                                                                                                                                                                |
| Carbohydrate Esterase (CE)        | 1        | acetyl xylan esterase (EC 3.1.1.72); cinnamoyl esterase (EC 3.1.1.-); feruloyl esterase (EC 3.1.1.73); carboxylesterase (EC 3.1.1.1); S-formylglutathione hydrolase (EC 3.1.2.12); diacylglycerol O-acyltransferase (EC 2.3.1.20); trehalose 6-O-mycophyltransferase (EC 2.3.1.122)                                                                                                                                                                                                                                                                                                                                                                                                                                                                                                                                                                                                                                                                                                                                                                                                                                                                |
|                                   | 4        | acetyl xylan esterase (EC 3.1.1.72); chitin deacetylase (EC 3.5.1.41); chitooligosaccharide deacetylase (EC 3.5.1.-); peptidoglycan GlcNAc deacetylase (EC 3.5.1.-); peptidoglycan N-acetylmuramic acid deacetylase (EC 3.5.1.-)                                                                                                                                                                                                                                                                                                                                                                                                                                                                                                                                                                                                                                                                                                                                                                                                                                                                                                                   |
|                                   | 11       | UDP-3-O-acyl N-acetylglucosamine deacetylase (EC 3.5.1.108)                                                                                                                                                                                                                                                                                                                                                                                                                                                                                                                                                                                                                                                                                                                                                                                                                                                                                                                                                                                                                                                                                        |
|                                   | 14       | N-acetyl-1-D-myo-inositol-2-amino-2-deoxy- $\alpha$ -D-glucopyranoside deacetylase (EC 3.5.1.89); diacetylchitobiose deacetylase (EC 3.5.1.-); mycothiol S-conjugate amidase (EC 3.5.1.-)                                                                                                                                                                                                                                                                                                                                                                                                                                                                                                                                                                                                                                                                                                                                                                                                                                                                                                                                                          |
| Glycoside Hydrolase (GH)          | 1        | $\beta$ -glucosidase (EC 3.2.1.21); $\beta$ -galactosidase (EC 3.2.1.23); $\beta$ -mannosidase (EC 3.2.1.25); $\beta$ -glucuronidase (EC 3.2.1.31); $\beta$ -xylosidase (EC 3.2.1.37); $\beta$ -D-fucosidase (EC 3.2.1.38); phlorizin hydrolase (EC 3.2.1.62); exo- $\beta$ -1,4-glucanase (EC 3.2.1.74); 6-phospho- $\beta$ -galactosidase (EC 3.2.1.85); 6-phospho- $\beta$ -glucosidase (EC 3.2.1.86); strictosidine $\beta$ -glucosidase (EC 3.2.1.105); lactase (EC 3.2.1.108); amygdalin $\beta$ -glucosidase (EC 3.2.1.117); prunasin $\beta$ -glucosidase (EC 3.2.1.118); vicianin hydrolase (EC 3.2.1.119); raucaffricine $\beta$ -glucosidase (EC 3.2.1.125); thioglucosidase (EC 3.2.1.147); $\beta$ -primeverosidase (EC 3.2.1.149); isoflavonoid 7-O- $\beta$ -apiosyl- $\beta$ -glucosidase (EC 3.2.1.161); ABA-specific $\beta$ -glucosidase (EC 3.2.1.175); DIMBOA $\beta$ -glucosidase (EC 3.2.1.182); $\beta$ -glycosidase (EC 3.2.1.-); hydroxyisourate hydrolase (EC 3.-.-.-); $\beta$ -rutosidase / $\alpha$ -L-rhamnose-(1,6)- $\beta$ -D-glucosidase (EC 3.2.1.-); protodioscin 26-O- $\beta$ -D-glucosidase (EC 3.2.1.186) |
|                                   | 3        | $\beta$ -glucosidase (EC 3.2.1.21); xylan 1,4- $\beta$ -xylosidase (EC 3.2.1.37); $\beta$ -glucosylceramidase (EC 3.2.1.45); $\beta$ -N-acetylhexosaminidase (EC 3.2.1.52); $\alpha$ -L-arabinofuranosidase (EC 3.2.1.55); glucan 1,4- $\beta$ -glucosidase (EC 3.2.1.74); isoprimeverose-producing oligoxyloglucan hydrolase (EC 3.2.1.120); coniferin $\beta$ -glucosidase (EC 3.2.1.126); exo-1,3-1,4-glucanase (EC 3.2.1.-); $\beta$ -N-acetylglucosaminide phosphorylases (EC 2.4.1.-); $\beta$ -1,2-glucosidase (EC 3.2.1.-); $\beta$ -1,3-glucosidase (EC 3.2.1.-); xyloglucan-specific exo- $\beta$ -1,4-glucanase / exo-xyloglucanase (EC 3.2.1.155); stevioside- $\beta$ -1,2-glucosidase (EC 3.2.1.-); lichenase / endo- $\beta$ -1,3-1,4-glucanase (EC 3.2.1.73); protodioscin 26-O- $\beta$ -D-glucosidase (EC 3.2.1.186); $\beta$ -glucuronidase (EC 3.2.1.31)                                                                                                                                                                                                                                                                       |
|                                   | 13_9     | [retaining] a-1,4-glucan branching enzyme (EC 2.4.1.18)                                                                                                                                                                                                                                                                                                                                                                                                                                                                                                                                                                                                                                                                                                                                                                                                                                                                                                                                                                                                                                                                                            |
|                                   | 13_11    | [retaining] 4-a-glucanotransferase / amyloamylase (EC 2.4.1.25); a-glycosidase (EC 3.2.1.-); [retaining] isoamylase (EC 3.2.1.68)                                                                                                                                                                                                                                                                                                                                                                                                                                                                                                                                                                                                                                                                                                                                                                                                                                                                                                                                                                                                                  |
|                                   | 13_18    | [retaining] sucrose 6(F)-phosphate phosphorylase (EC 2.4.1.329); Glucosylglycerate phosphorylase (EC 2.4.1.352); [retaining] glucosylglycerol phosphorylase (EC 2.4.1.359); [retaining] sucrose phosphorylase (EC 2.4.1.7)                                                                                                                                                                                                                                                                                                                                                                                                                                                                                                                                                                                                                                                                                                                                                                                                                                                                                                                         |
|                                   | 23       | lysozyme type G (EC 3.2.1.17); peptidoglycan lyase (EC 4.2.2.n1) also known in the literature as peptidoglycan lytic transglycosylase; chitinase (EC 3.2.1.14)                                                                                                                                                                                                                                                                                                                                                                                                                                                                                                                                                                                                                                                                                                                                                                                                                                                                                                                                                                                     |
|                                   | 102      | peptidoglycan lytic transglycosylase (EC 3.2.1.-)                                                                                                                                                                                                                                                                                                                                                                                                                                                                                                                                                                                                                                                                                                                                                                                                                                                                                                                                                                                                                                                                                                  |
|                                   | 103      | peptidoglycan lytic transglycosylase (EC 3.2.1.-)                                                                                                                                                                                                                                                                                                                                                                                                                                                                                                                                                                                                                                                                                                                                                                                                                                                                                                                                                                                                                                                                                                  |
|                                   | 105      | unsaturated rhamnogalacturonyl hydrolase (EC 3.2.1.172); d-4,5-unsaturated $\beta$ -glucuronyl hydrolase (EC 3.2.1.-); d-4,5-unsaturated $\alpha$ -galacturonidase (EC 3.2.1.-)                                                                                                                                                                                                                                                                                                                                                                                                                                                                                                                                                                                                                                                                                                                                                                                                                                                                                                                                                                    |
|                                   | 108      | N-acetylmuramidase (EC 3.2.1.17)                                                                                                                                                                                                                                                                                                                                                                                                                                                                                                                                                                                                                                                                                                                                                                                                                                                                                                                                                                                                                                                                                                                   |
|                                   | 109      | $\alpha$ -N-acetylglactosaminidase (EC 3.2.1.49); $\beta$ -N-acetylhexosaminidase (EC 3.2.1.52)                                                                                                                                                                                                                                                                                                                                                                                                                                                                                                                                                                                                                                                                                                                                                                                                                                                                                                                                                                                                                                                    |

|                             |    |                                                                                                                                                                                                                                                                                                                                                                                                                                                                                                                                                                                                                                                                                                                                                                                                                                                                                                                                                                                                                                                                                                                                      |
|-----------------------------|----|--------------------------------------------------------------------------------------------------------------------------------------------------------------------------------------------------------------------------------------------------------------------------------------------------------------------------------------------------------------------------------------------------------------------------------------------------------------------------------------------------------------------------------------------------------------------------------------------------------------------------------------------------------------------------------------------------------------------------------------------------------------------------------------------------------------------------------------------------------------------------------------------------------------------------------------------------------------------------------------------------------------------------------------------------------------------------------------------------------------------------------------|
| GlycosylTransferase<br>(GT) | 2  | cellulose synthase (EC 2.4.1.12); chitin synthase (EC 2.4.1.16); dolichyl-phosphate $\beta$ -D-mannosyltransferase (EC 2.4.1.83); dolichyl-phosphate $\beta$ -glucosyltransferase (EC 2.4.1.117); N-acetylglucosaminyltransferase (EC 2.4.1.-); N-acetylgalactosaminyltransferase (EC 2.4.1.-); hyaluronan synthase (EC 2.4.1.212); chitin oligosaccharide synthase (EC 2.4.1.-); $\beta$ -1,3-glucan synthase (EC 2.4.1.34); $\beta$ -1,4-mannan synthase (EC 2.4.1.-); $\beta$ -mannosylphosphodecaprenol-mannooligosaccharide $\alpha$ -1,6-mannosyltransferase (EC 2.4.1.199); UDP-Galf: rhamnopyranosyl-N-acetylglucosaminyl-PP-decaprenol $\beta$ -1,4/1,5-galactofuranosyltransferase (EC 2.4.1.287); UDP-Galf: galactofuranosyl-galactofuranosyl-rhamnosyl-N-acetylglucosaminyl-PP-decaprenol $\beta$ -1,5/1,6-galactofuranosyltransferase (EC 2.4.1.288); dTDP-L-Rha: N-acetylglucosaminyl-PP-decaprenol $\alpha$ -1,3-L-rhamnosyltransferase (EC 2.4.1.289); alternating $\beta$ -1,3/4-N-acetylmannan synthase (2.4.1.-); UDP-GlcA: N-acetylglucosaminyl-proteoglycan $\beta$ -1,4-glucuronosyltransferase (EC 2.4.1.225) |
|                             | 4  | sucrose synthase (EC 2.4.1.13); sucrose-phosphate synthase (EC 2.4.1.14); $\alpha$ -glucosyltransferase (EC 2.4.1.52); lipopolysaccharide N-acetylglucosaminyltransferase (EC 2.4.1.56); phosphatidylinositol $\alpha$ -mannosyltransferase (EC 2.4.1.57); GDP-Man: Man1GlcNAc2-PP-dolichol $\alpha$ -1,3-mannosyltransferase (EC 2.4.1.132); GDP-Man: Man3GlcNAc2-PP-dolichol/Man4GlcNAc2-PP-dolichol $\alpha$ -1,2-mannosyltransferase (EC 2.4.1.131); digalactosyldiacylglycerol synthase (EC 2.4.1.141); 1,2-diacylglycerol 3-glucosyltransferase (EC 2.4.1.157); diglucosyl diacylglycerol synthase (EC 2.4.1.208); trehalose phosphorylase (EC 2.4.1.231); NDP-Glc: $\alpha$ -glucose $\alpha$ -glucosyltransferase / $\alpha$ , $\alpha$ -trehalose synthase (EC 2.4.1.245); GDP-Man: Man2GlcNAc2-PP-dolichol $\alpha$ -1,6-mannosyltransferase (EC 2.4.1.257); UDP-GlcNAc: 2-                                                                                                                                                                                                                                                |
|                             | 5  | deoxystreptamine $\alpha$ -N-acetylglucosaminyltransferase (EC 2.4.1.283); UDP-GlcNAc: ribostamycin $\alpha$ -N-acetylglucosaminyltransferase (EC 2.4.1.285); UDP-Gal $\alpha$ -galactosyltransferase (EC 2.4.1.-); UDP-Xyl $\alpha$ -xylosyltransferase (EC 2.4.2.-); UDP-GlcA $\alpha$ -glucuronyltransferase (EC 2.4.1.-); UDP-Glc $\alpha$ -glucosyltransferase (EC 2.4.1.-); UDP-GalNAc: GalNAc-PP-Und $\alpha$ -1,3-N-acetylgalactosaminyltransferase (EC 2.4.1.306); UDP-GalNAc: N,N'-diacetyl bacillosaminyl-PP-Und $\alpha$ -1,3-N-acetylgalactosaminyltransferase (EC 2.4.1.290); ADP-dependent $\alpha$ -maltose-1-phosphate synthase (2.4.1.342); [retaining] UDP-GlcNAc: polypeptide $\alpha$ -N-acetylglucosaminyltransferase (EC 2.4.1.-); UDP-GlcNAc: $\alpha$ -N-acetylglucosaminyltransferase (EC 2.4.1.-)                                                                                                                                                                                                                                                                                                         |
|                             | 8  | UDP-Glc: glycogen glucosyltransferase (EC 2.4.1.11); ADP-Glc: starch glucosyltransferase (EC 2.4.1.21); NDP-Glc: starch glucosyltransferase (EC 2.4.1.242); UDP-Glc: $\alpha$ -1,3-glucan synthase (EC 2.4.1.183) UDP-Glc: $\alpha$ -1,4-glucan synthase (EC 2.4.1.-)                                                                                                                                                                                                                                                                                                                                                                                                                                                                                                                                                                                                                                                                                                                                                                                                                                                                |
|                             | 14 | lipopolysaccharide $\alpha$ -1,3-galactosyltransferase (EC 2.4.1.44); UDP-Glc: (glucosyl)lipopolysaccharide $\alpha$ -1,2-glucosyltransferase (EC 2.4.1.-); lipopolysaccharide glucosyltransferase 1 (EC 2.4.1.58); glycogenin glucosyltransferase (EC 2.4.1.186); inositol 1- $\alpha$ -galactosyltransferase (galactinol synthase) (EC 2.4.1.123); homogalacturonan $\alpha$ -1,4-galacturonosyltransferase (EC 2.4.1.43); UDP-GlcA: xylan $\alpha$ -glucuronyltransferase (EC 2.4.1.-); UDP-Gal: glucoside $\alpha$ -1,3-galactosyltransferase (EC 2.4.1.-)                                                                                                                                                                                                                                                                                                                                                                                                                                                                                                                                                                       |
|                             | 19 | $\beta$ -1,3-galactosyl-O-glycosyl-glycoprotein $\beta$ -1,6-N-acetylglucosaminyltransferase (EC 2.4.1.102); N-acetylactosaminide $\beta$ -1,6-N-acetylglucosaminyltransferase (EC 2.4.1.150); protein O- $\beta$ -xylosyltransferase (EC 2.4.2.26); UDP-GlcA: arabinogalactan $\beta$ -glucuronosyltransferase (EC 2.4.1.-)                                                                                                                                                                                                                                                                                                                                                                                                                                                                                                                                                                                                                                                                                                                                                                                                         |
|                             | 20 | lipid-A-disaccharide synthase (EC 2.4.1.182).                                                                                                                                                                                                                                                                                                                                                                                                                                                                                                                                                                                                                                                                                                                                                                                                                                                                                                                                                                                                                                                                                        |
|                             | 28 | $\alpha$ , $\alpha$ -trehalose-phosphate synthase [UDP-forming] (EC 2.4.1.15); Glucosylglycerol-phosphate synthase (EC 2.4.1.213); trehalose-6-P phosphatase (EC 3.1.3.12); [retaining] GDP-valeniol: validamine 7-phosphate valeniolyltransferase (EC 2.-.-.-)                                                                                                                                                                                                                                                                                                                                                                                                                                                                                                                                                                                                                                                                                                                                                                                                                                                                      |
|                             | 30 | 1,2-diacylglycerol 3- $\beta$ -galactosyltransferase (EC 2.4.1.46); 1,2-diacylglycerol 3- $\beta$ -glucosyltransferase (EC 2.4.1.157); UDP-GlcNAc: Und-PP-MurAc-pentapeptide $\beta$ -N-acetylglucosaminyltransferase (EC 2.4.1.227); digalactosyldiacylglycerol synthase (EC 2.4.1.241)                                                                                                                                                                                                                                                                                                                                                                                                                                                                                                                                                                                                                                                                                                                                                                                                                                             |
|                             | 35 | CMP- $\beta$ -KDO: $\alpha$ -3-deoxy-D-manno-octulosonic-acid (KDO) transferase (EC 2.4.99.-).                                                                                                                                                                                                                                                                                                                                                                                                                                                                                                                                                                                                                                                                                                                                                                                                                                                                                                                                                                                                                                       |
|                             | 51 | glycogen or starch phosphorylase (EC 2.4.1.1).                                                                                                                                                                                                                                                                                                                                                                                                                                                                                                                                                                                                                                                                                                                                                                                                                                                                                                                                                                                                                                                                                       |
|                             | 81 | murein polymerase (EC 2.4.1.129).                                                                                                                                                                                                                                                                                                                                                                                                                                                                                                                                                                                                                                                                                                                                                                                                                                                                                                                                                                                                                                                                                                    |
|                             | 83 | NDP-Glc: glucosyl-3-phosphoglycerate synthase (EC 2.4.1.266); NDP-Man: mannosyl-3-phosphoglycerate synthase (EC 2.4.1.217); ADP-Glc: glucosyl-2-glycerate synthase (EC 2.4.1.-); mannosyl-3-phosphoglycerate synthase / [retaining] GDP-Man: 3-phosphoglycerate $\alpha$ -mannosyltransferase (EC 2.4.1.217)                                                                                                                                                                                                                                                                                                                                                                                                                                                                                                                                                                                                                                                                                                                                                                                                                         |
| 107                         |    | undecaprenyl phosphate- $\alpha$ -L-Ara4N: 4-amino-4-deoxy- $\beta$ -L-arabinosyltransferase (EC 2.4.2.43); dodecaprenyl phosphate- $\beta$ -galacturonic acid: lipopolysaccharide core $\alpha$ -galacturonosyl transferase (EC 2.4.1.-)                                                                                                                                                                                                                                                                                                                                                                                                                                                                                                                                                                                                                                                                                                                                                                                                                                                                                            |
